# Supplementary material for: Genome evolution in an ancient bacteria-ant symbiosis: parallel gene loss among Blochmannia spanning the origin of the ant tribe Camponotini
Source: PeerJ. 2015 Apr 2;3:e881. doi: 10.7717/peerj.881 (PMC4389277; doi:10.7717/peerj.881)
Supplement: Table S1 — To examine gene degradation, we used TBLASTN to align Blochmannia pseudogenes to protein sequences of intact genes from the most closely related lineage. [file peerj-03-881-s001.xlsx]

## Sheet: Sheet1
pseudogene	intact gene	% cvg of intact sequence (query cvg)	range of e-values for alignments	# of alignments	total alignment length	# of frameshifts	# of premature stop codons w/in alignments
Bobliq_dnaA	Bturn_dnaA	88	7e-49	5	405	4	12
Bobliq_engD	Bturn_engD	8	7e-05	1	26	0	0	did not include 4.9 alignment
Bobliq_glnA	Bturn_glnA	17	2e-06	1	44	0	0	did not include 0.067 and 0.46 alignments
Bobliq_pdxA	Bturn_pdxA	90	5e-38, 2e-51	2	327	1	2
Bobliq_pdxB	Bturn_pdxB	81	1e-08, 3e-31	2	320	1	14
Bobliq_pdxJ	Bturn_pdxJ	90	7e-48	1	229	0	2
Bobliq_ribA	Bpenn_ribA	63	2e-33	1	127	0	2
Bobliq_ribB	Bpenn_ribB	15	2e-12	1	34	0	1
Bobliq_ribC	Bpenn_ribE	41	1e-06	1	86	0	1
Bobliq_ribD	Bpenn_ribD	67	1e-14	1	239	0	12	did not include 2e-04 alignment
Bobliq_secD	Bpenn_secD	96	2e-125	4	576	3	4
Bobliq_secF	Bpenn_secF	98	4e-61	1	299	0	3
Bobliq_topA	Bturn_topA	82	1e-06, 5e-52	7	677	6	25	did not include 0.45 alignment
Bobliq_uvrD	Ecoli_uvrD	78	4e-27	4	590	3	28
Bobliq_yigB	Bturn_yigB	67	8e-19	3	168	2	5
Bturn_BPEN535	Bpenn_BPEN535	58	8e-08	1	63	0	0
Bpenn_rpmD	Bvafe_rpmD	56	0.0007	1	18	0	0
Bpenn_uvrD	Ecoli_uvrD	81	1e-12, 1e-63	5	599	4	11
Bpenn_yqiC	Bvafe_yqiC	7	0.47	1	7	0	0
Bflor_ispG	Bvafe_ispG	68	1e-29	2	263	1	7
Bflor_ispH	Bvafe_ispH	94	2e-41	4	300	3	18
Bflor_ispF	Bvafe_ispF	70	5e-19	3	111	2	3
Bflor_ispD	Bvafe_ispD	16	8e-12	1	33	0	0	did not include 0.74 alignment
Bvafe_queA	Bflor_queA	39	1e-05, 2e-07	3	122	2	9	did not include 1.3 alignment
Bvafe_bcp	Bflor_bcp	95	6e-28	1	117	0	5
